# Supplementary material
Source: ML conference proceedings conference paper supplement (https://openaccess.thecvf.com/content/CVPR2026/html/Zarar_NeuroRule_Bridging_Vision_CVPR_2026_paper.html)
Supplement: Supplementary file 1 [file Zarar_NeuroRule_Bridging_Vision_CVPR_2026_supplemental.pdf]

# NeuroRule: Bridging Vision and Logic with Differentiable Rule Induction (Supplementary Material)

This supplementary document provides additional details that complement the main paper: (i) explicit equations for the rule regularizer  $\Omega(\text{Rul})$  used in Eq. (8), (ii) expanded implementation and training protocol, (iii) computational complexity details, and (iv) additional guidance on extracting rule-based reasoning chains.

## 1. Expanded Implementation Details

In implementation, NeuroRule in PyTorch (v2.0) with CUDA (v11.8) and train on 4 NVIDIA A100 GPUs (80GB each). Unless otherwise stated, images are resized to  $512 \times 512$ . We use batch size 8 with gradient accumulation every 4 steps (effective batch size 32), fix random seeds, and report averages over 5 runs when  $\text{mean} \pm \text{std}$ .

The NeuroRule implementation features a modular architecture for scene graph generation, comprising a Mask2Former Feature Extractor that processes images to extract entity features and spatial relationships (currently using dummy implementations for compatibility), a Rule Learner module that applies differentiable logical rules through attention-based predicate selection and tensor operations for multi-relation prediction, and the main NeuroRule model that integrates visual feature extraction with rule-based reasoning using PyTorch’s auto grad for end-to-end training. The training pipeline utilizes a custom Scene Graph Dataset for loading JSON-formatted scene graph annotations, employs BCE with Logits Loss for multi-label relation prediction, and implements early stopping with model checkpointing. At the same time, utility functions handle configuration management, metrics computation, and knowledge graph export, all optimized for CPU/GPU execution with configurable hyperparameters for rule complexity and feature dimensions.

Further hardware details are available in the Compute Report PDF file.

### 1.1. Training Protocol

The training follows a three-phase protocol: initial Mask2Former fine-tuning, joint neural-symbolic optimization, and rule refinement. We use a three-phase optimization schedule

Table 1. Key implementation details (consistent with Sec.4.2 of the main paper).

| Component                     | Setting                          |
|-------------------------------|----------------------------------|
| Backbone                      | Mask2Former (Swin-L)             |
| Input resolution              | $512 \times 512$                 |
| Optimizer (rule module)       | AdamW                            |
| Learning rate                 | $5 \times 10^{-5}$               |
| Weight decay                  | $1 \times 10^{-4}$               |
| Rule template repository size | $\leq 1000$                      |
| Max rule body length          | $L = 4$                          |
| Rule regularization weight    | $\lambda = 0.1$                  |
| Batch size / effective batch  | 8 / 32 (grad accum. $\times 4$ ) |

- Mask2Former warm-up.** Fine-tune the Mask2Former backbone to stabilize pixel-precise entity masks and features.
- Joint neural-symbolic training.** Optimize the full pipeline end-to-end (visual backbone + predicate scoring + differentiable rule induction).
- Rule refinement.** Freeze visual components and continue optimizing the rule module (rule weights and selection logits) under  $\Omega(\text{Rul})$  to encourage compact, stable rules.

### 1.2. Hyperparameters

Table 1 summarizes key hyperparameters used throughout the experiments.

## 2. Datasets Detailed Descriptions

We evaluate NeuroRule on three complementary benchmarks, VG, PSG, and Open-PSG, chosen to support different tasks of pixel-precise neuro-symbolic reasoning. A comparative overview of these three benchmarks is illustrated with an example in Fig. 1.

**Visual Genome (VG).** VG is a representative SGG benchmark with 108K annotated images. We follow the standard split and evaluate under the **SGDet** setting using **R@K**, **mR@K**, and **AP50**. This benchmark is a strong testbed for NeuroRule compositional rule induction because rela-

Table 2. Dataset summary as specified in Sec. 4.1 of the main paper.

| Dataset  | Annotation          | Primary Evaluation                 |
|----------|---------------------|------------------------------------|
| VG       | SGG triplets        | SGDet: R@K, mR@K, AP <sub>50</sub> |
| PSG      | Mask-level panoptic | Cont@R, Supp@R, Cont@              |
| Open-PSG | Open-vocab + NL     | OE/OR + comp./transfer             |

tion prediction must be learned jointly with object localization and contextual reasoning.

**Panoptic Scene Graph (PSG).** PSG extends COCO with pixel-precise panoptic annotations over 48.7K images, enabling *mask-grounded* spatial understanding. We follow the standard PSG protocol and report spatial relation metrics **Cont@R, Supp@R, Cont@**, which directly test geometric reasoning. This dataset provides strong evidence for NeuroRule because our rules are grounded on mask-level entity representations produced by Mask2Former, aligning the symbolic reasoning chain with precise spatial evidence rather than coarse boxes.

Our current supplementary discussion also describes PSG as containing approximately **49,000** images with pixel-level spatial relation annotations, which is consistent up to rounding.

**Open Panoptic Scene Graph (Open-PSG).** Open-PSG builds on PSG by adding open-vocabulary annotations and natural-language descriptions, enabling evaluation of *zero-shot* generalization to unseen categories. We evaluate open-world capabilities using the Open-Entity (OE) and Open-Relations (OR) settings defined in the main paper, together with compositional/transfer metrics reported in Tab.2.

Our current supplementary discussion further characterizes the Open-PSG test set as containing **15,000 test images** with **30%** novel relation combinations and **15%** completely unseen relation types for zero-shot evaluation. These properties make Open-PSG a strong benchmark for NeuroRule, because explicit compositional rules can transfer across contexts and support robust reasoning beyond the training distribution.

## 2.1. Open-world evaluation settings on Open-PSG

To make the open-world settings explicit, we follow the definitions from Sec. 4.1 of the main paper:

- **Open-Relations (OR):** object classes are seen during training while the *predicate* is unseen at test time.
- **Open-Entity (OE):** predicate classes are seen during training while the *object classes* are unseen at test time.

These settings directly measure whether NeuroRule learned compositional rules and chaining can generalize to novel entities/predicates rather than only memorizing dataset-specific co-occurrences.

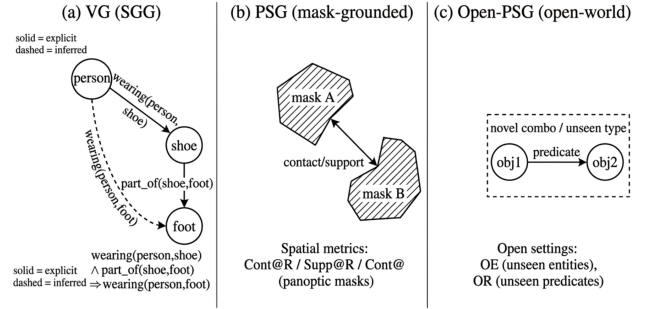

Figure 1. A comparison view of distinct SGG for the dataset. (a) Traditional SGG (VG): Focuses on object-level nodes and utilizes logical reasoning to deduce inferred relations. (b) Mask-Grounded PSG: Shifts from bounding boxes to panoptic masks, capturing precise spatial interactions evaluated via mask-level metrics. (c) Open-World SGG (Open-PSG): Expands beyond fixed vocabularies to discover novel compositional triplets, including unseen entities (OE) and unseen predicates (OR).

## 3. Details of the Rule Regularization

The main paper defines the training loss (Eq. (8)) and states that  $\Omega(\text{Rul})$  contains an  $L_1$  sparsity term  $\Omega_{\text{sparsity}}$  and a semantic term  $\Omega_{\text{semantic}}$  that maximizes rule body-head similarity. Here we provide explicit equations.

Let  $\alpha = \{\alpha_r\}_{r=1}^R$  be the learnable rule weights (Eq. (4)). We define:

$$\Omega_{\text{sparsity}}(\text{Rul}) = \|\alpha\|_1 = \sum_{r=1}^R |\alpha_r|. \quad (1)$$

This encourages a small *active* set of high-weight rules, improving interpretability and reducing spurious rule firing.

### 3.1. Semantic coherence via body-head similarity

Each predicate  $P \in \mathcal{P}$  has an embedding  $\mathbf{W}_P \in \mathbb{R}^d$  (main paper, ‘‘Predicate Embedding’’). For a rule  $r$ , denote the head predicate as  $P_{\text{head}}^{(r)}$  and the (softly selected) body predicates at position  $l$  by weights  $\beta_{l,P}^{(r)}$  (Eqs. (5)-(6)). We define the head embedding and a soft body embedding as:

$$\mathbf{e}_{\text{head}}^{(r)} = \mathbf{W}_{P_{\text{head}}^{(r)}}, \quad (2)$$

$$\mathbf{e}_{\text{body}}^{(r)} = \frac{1}{L} \sum_{l=1}^L \sum_{P \in \mathcal{P}} \beta_{l,P}^{(r)} \mathbf{W}_P. \quad (3)$$

We then define a cosine-similarity penalty:

$$\Omega_{\text{semantic}}(\text{Rul}) = \frac{1}{R} \sum_{r=1}^R \left( 1 - \cos \left( \mathbf{e}_{\text{body}}^{(r)}, \mathbf{e}_{\text{head}}^{(r)} \right) \right), \quad (4)$$

where,

$$\cos(\mathbf{a}, \mathbf{b}) = \frac{\mathbf{a}^\top \mathbf{b}}{\|\mathbf{a}\| \|\mathbf{b}\|}. \quad (5)$$

This favors semantically aligned body/head predicates and helps avoid logically incoherent clauses. Finally,

$$\Omega(\text{Rul}) = \Omega_{\text{sparsity}}(\text{Rul}) + \Omega_{\text{semantic}}(\text{Rul}). \quad (6)$$

The total loss as in Eq. (8) of the main paper is;

$$\mathcal{L} = \sum_{(I,T)} \sum_{(s,r,o) \in T} (\lambda \Omega(\text{Rul}) - \log P(r(s, o))) \quad (7)$$

## 4. Differentiable Existential in Rule Chaining

The main paper computes multi-hop body truth values with an existential max over intermediate entities (Eq. (7)) and notes a differentiable approximation. We implement the approximation with a temperature-controlled log-sum-exp:

$$t_{\text{body}}^r(s, o) = \max_{\mathbf{e} \in \mathcal{E}^k} \prod_{i=1}^k t_{P_i}(e_i, e_{i+1}), \quad (8)$$

$$\max_j x_j \approx \tau \log \sum_j \exp(x_j / \tau), \quad (9)$$

where  $\tau > 0$  controls smoothness ( $\tau \downarrow 0$  approaches hard max). This yields stable gradients while preserving the intended existential semantics.

### 4.1. Efficiency and Computational Complexity

We provide a complementary complexity analysis to the inference-time plots in the main paper.

Let  $N$  be the number of detected entities,  $M \leq N^2$  the number of candidate subject–object pairs after pruning,  $P = |\mathcal{P}|$  the number of predicates,  $R$  the number of candidate rules (templates),  $L$  the maximum body length, and  $H$  the maximum chaining depth as shown in Tab. 3.

**Predicate scoring.** Computing all predicate truth values for  $M$  pairs scales as  $O(M \cdot P)$  (Eq. (2)).

**Rule evaluation (single hop).** Evaluating  $R$  rules of length  $L$  over  $M$  pairs is  $O(M \cdot R \cdot L)$  (Eqs. (3)-(4)).

**Multi-hop chaining.** In the depth  $H$ , chaining scales as  $O(H \cdot M \cdot R \cdot L)$  in the vectorized implementation, with the existential aggregation realized by softmax/log-sum-exp.

**Memory.** Storing predicate truth tensors and rule activations is  $O(MP + MR)$ . In practice, the visual backbone dominates computation; the rule module is controlled by bounded  $(L, H)$ , sparsity in  $\alpha$ , and pair pruning.

## 5. Reasoning Chains and Rule Outputs

NeuroRule outputs relation triplets  $(s, r, o)$  (SGG edges) and can also provide an explicit *reasoning chain* as an explanation. For a predicted relation  $r(s, o)$ , we compute each rule’s contribution:

Table 3. Asymptotic complexity of the differentiable rule module.

| Stage                 | Time      | Memory  |
|-----------------------|-----------|---------|
| Predicate scoring     | $O(MP)$   | $O(MP)$ |
| Rule eval. (1-hop)    | $O(MRL)$  | $O(MR)$ |
| Chaining (depth $H$ ) | $O(HMRL)$ | $O(MR)$ |

$$\text{score}_r(s, o) = \alpha_r \cdot t_{\text{body}}^r(s, o), \quad (10)$$

The top- $K$  rules by  $\text{score}_r(s, o)$ , together with the intermediate entities selected by the (soft) existential operator. This yields a step-wise trace, such as the example shown in Fig.3 of the main paper:  $\text{wearing}(\text{person}, \text{shoe}) \wedge \text{part\_of}(\text{shoe}, \text{foot}) \Rightarrow \text{wearing}(\text{person}, \text{foot})$ .

In this example:

- The target relation and confidence  $P(r(s, o))$ .
- The top- $K$  contributing rules (rule text +  $\alpha_r$ ).
- The supporting predicate truth values used in the body.
- The selected intermediate entities for multi-hop chains.
